# Supplementary material for: Peripheral infrastructure vectors and an extended set of plant parts for the Modular Cloning system
Source: PubMed Central journal article supplement (PMC5976141; doi:10.1371/journal.pone.0197185), 2018-05-30
Supplement: pone.0197185.s001.pdf [file pone.0197185.s001.pdf]

Figure S1 Gantner et al.

**a** pJOG130

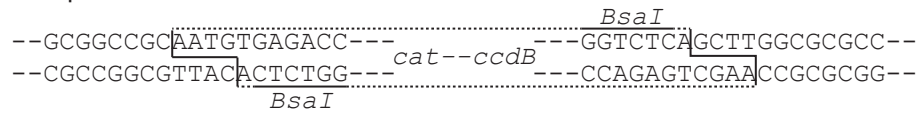

Primer design (for cloning of CDS from ATG to STOP):

Forward: 5' tttggtctcaATG (N)<sub>16-20</sub> 3'

Reverse: 5' tttggtctcaaagcCTA (N)<sub>16-20</sub> 3'  
                                   TTA  
                                   TCA

**b** pJOG131

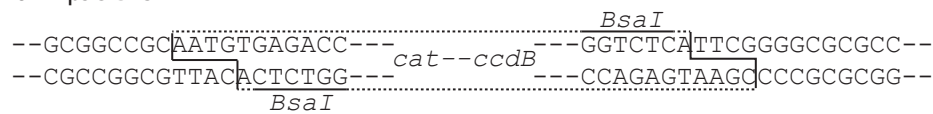

Primer design (for cloning of CDS from ATG without STOP):

Forward: 5' tttggtctcaATG (N)<sub>16-20</sub> 3'

Reverse: 5' tttggtctcacgaagc (N)<sub>19-23</sub> 3'  
                                   | s | A |

Supplemental Figure S1: Primer design for cloning into Golden Gate-compatible entry vectors pJOG130/131.

(a) The *ccdB* cassette contained in pJOG130 with *BsaI* restriction sites underlined is shown. The adaptors required for PCR amplification of suitable fragments are depicted below. Underlined sequences represent the 4 bp overhangs utilized for Golden Gate cloning, and Ns represent the gene specific portion of respective PCR primers.

(b) as in (a), but for pJOG131.
