# Supplementary material for: Peripheral infrastructure vectors and an extended set of plant parts for the Modular Cloning system
Source: PubMed Central journal article supplement (PMC5976141; doi:10.1371/journal.pone.0197185), 2018-05-30
Supplement: pone.0197185.s002.pdf [file pone.0197185.s002.pdf]

Figure S2 Gantner et al.

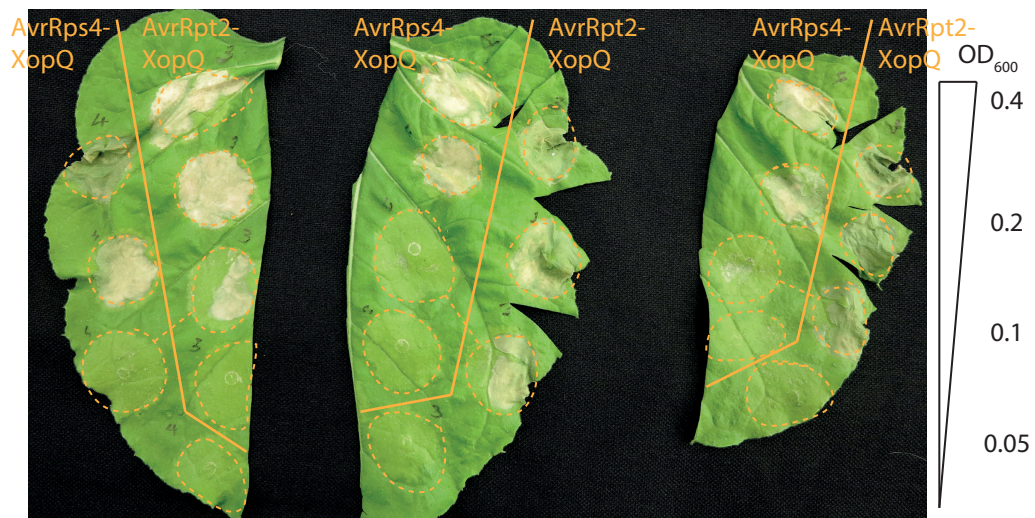

Supplemental Figure S2: Enhanced hypersensitive response induction by AvrRpt2-XopQ fusions.

*Pseudomonas fluorescens* strains translocating either AvrRpt2<sub>1-100</sub>-XopQ or AvrRps4<sub>1-134</sub>-XopQ fusions were inoculated into wild type *N. benthamiana* plants, and symptom formation was documented 3 dpi. Four different bacterial densities, ranging from OD<sub>600</sub>=0.4-0.05 were used, and were infiltrated descendingly in the indicated leaf sections.
