# Supplementary material for: Peripheral infrastructure vectors and an extended set of plant parts for the Modular Cloning system
Source: PubMed Central journal article supplement (PMC5976141; doi:10.1371/journal.pone.0197185), 2018-05-30
Supplement: pone.0197185.s003.pdf [file pone.0197185.s003.pdf]

Supplemental Figure S3 Gantner et al.

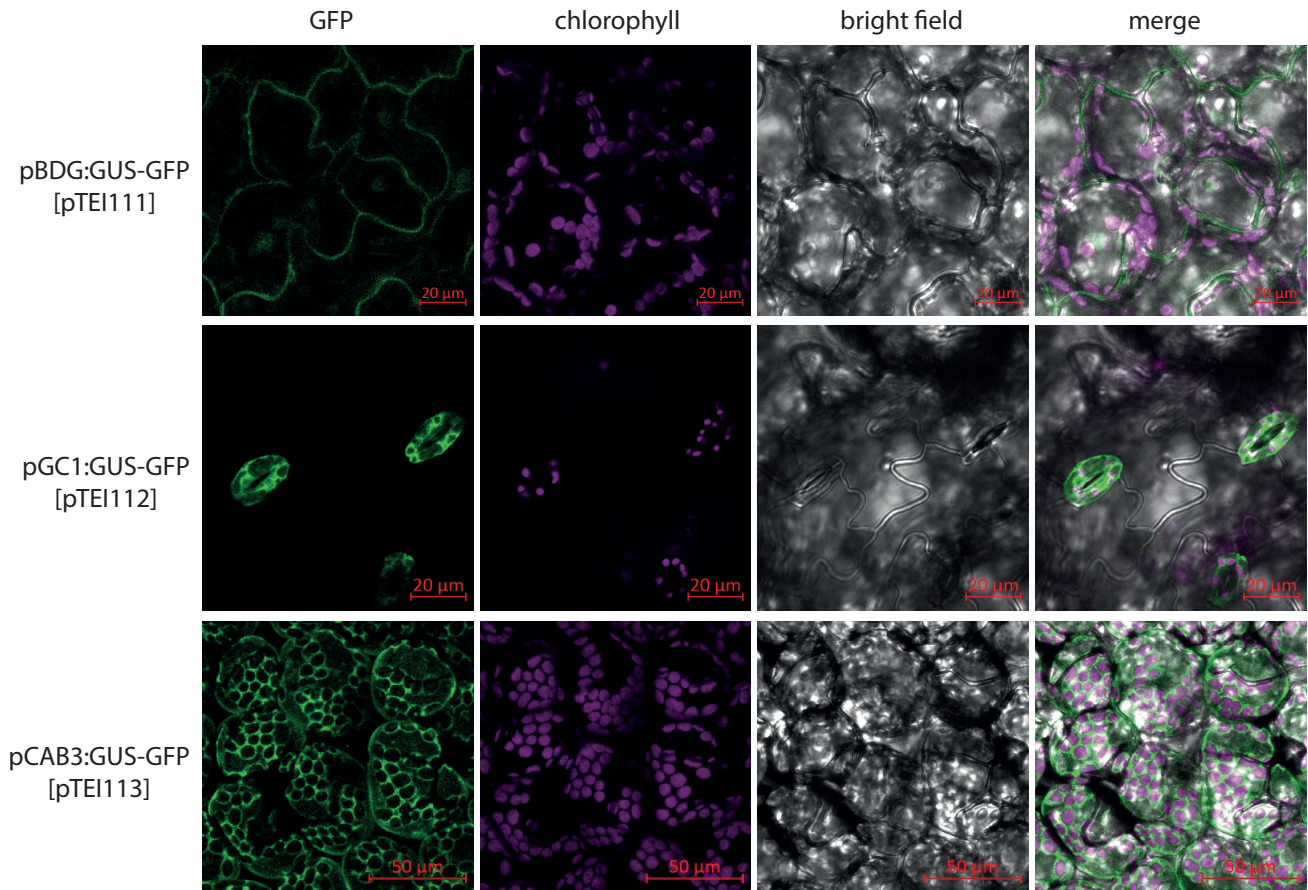

Supplemental Figure S3: Promoter fragments for tissue-specific gene expression in Arabidopsis leaves

Transgenic Arabidopsis plants expressing GUS-GFP under control of the indicated promoter fragments were generated, and three-week-old T<sub>1</sub> plants analyzed by confocal laser scanning microscopy. Maximum intensity projections of z-stacks are shown. Three independent T<sub>1</sub> plants were analyzed for each construct with similar results.
