# Supplementary material for: Peripheral infrastructure vectors and an extended set of plant parts for the Modular Cloning system
Source: PubMed Central journal article supplement (PMC5976141; doi:10.1371/journal.pone.0197185), 2018-05-30
Supplement: pone.0197185.s004.pdf [file pone.0197185.s004.pdf]

Supplemental Figure S4 Gantner et al.

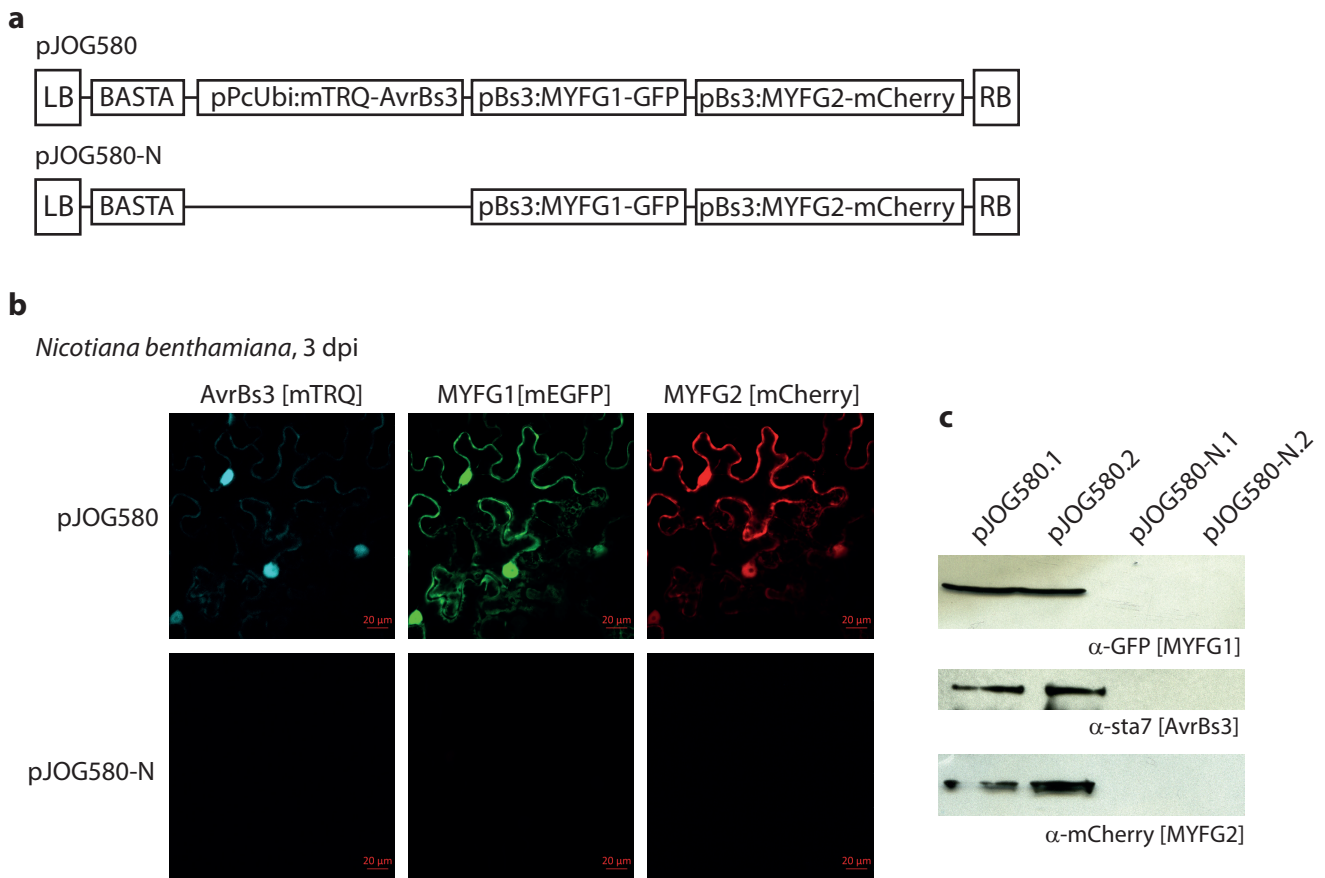

Supplemental Figure S4: Utilization of TALEs for tightly regulated, high-level transactivation

(a) Schematic drawing of transactivation constructs used for transient expression.

(b) Strong and specific transactivation of TALE-controlled genes. *Agrobacterium* strains containing constructs depicted in (a) were infiltrated into *N. benthamiana*. Leaf tissues were analyzed by confocal laser-scanning microscopy 3 dpi.

(c) Immunoblot analysis of protein extracts prepared from leaf tissues analyzed in (b).
