# Supplementary material for: Peripheral infrastructure vectors and an extended set of plant parts for the Modular Cloning system
Source: PubMed Central journal article supplement (PMC5976141; doi:10.1371/journal.pone.0197185), 2018-05-30
Supplement: pone.0197185.s006.pdf [file pone.0197185.s006.pdf]

Table S1: Oligonucleotides used in this study

| Construct   | Oligo Name                                                                                                                                                                                                         | Sequence                                                                                                                                                                                                                                                                                        |
|-------------|--------------------------------------------------------------------------------------------------------------------------------------------------------------------------------------------------------------------|-------------------------------------------------------------------------------------------------------------------------------------------------------------------------------------------------------------------------------------------------------------------------------------------------|
| A1_pJOG130  | JS946_pEGG_aatg_F<br>JS650-pEGG_R                                                                                                                                                                                  | tttGCGGCCGCaatgTgagaccATTAGGCACCCCAGGCTT<br>tttgcgcgccaageTGAGACCGTCGACCTGCAGACTGGC                                                                                                                                                                                                             |
| A2_pJOG131  | JS946_pEGG_aatg_F<br>JS963_ccdB_R                                                                                                                                                                                  | tttGCGGCCGCaatgTgagaccATTAGGCACCCCAGGCTT<br>tttgcgcgccccgaaTGAGACCGTCGACCTGCAGACTGGC                                                                                                                                                                                                            |
| A3_pJOG387  | JG95_attR1_GW_F<br>JG159_GW-CDS1_R                                                                                                                                                                                 | TTTgaagacAAaatgACAAGTTTGTACAAAAAAGCTG<br>TTTgaagacAAaagcACCACCTTTGTACAAGAAAGCTG                                                                                                                                                                                                                 |
| A4_pJOG267  | JG95_attR1_GW_F<br>JG96_attR2_GW_R                                                                                                                                                                                 | TTTgaagacAAaatgACAAGTTTGTACAAAAAAGCTG<br>TTTgaagacAAcgaACCACCTTTGTACAAGAAAGCTG                                                                                                                                                                                                                  |
| A5_pJOG562  | JG258_GW_BsaI_F<br>JG259_GW_BsaI_R                                                                                                                                                                                 | TTTggtctcAaggacACAAGTTTGTACAAAAAAGCTG<br>TTTggtctcAcgaaACCACCTTTGTACAAGAAAGCTG                                                                                                                                                                                                                  |
| A6_pJOG417  | JS1143_BsaI_bla_SDM_F<br>JS1144_BsaI_bla_SDM_R<br>JS1145_BsaI_pGAD_SDM_F<br>JS1146_BsaI_pGAD_SDM_R<br>JS1170_lacZ_Y2Hvec_CDS1F<br>JS1171_lacZ_pGAD_CDS1R                                                           | GCCGGTGAGCGTGGaTCTCGCGGTATCAT<br>ATGATACCGCGAGAtCCACGCTCACCGGC<br>TAATACCTTCGTTGaTCTCCCTAACATGT<br>ACATGTTAGGGAGAtCAACGAAGGTATTA<br>tttgaagacaaAATTaatgtgagaccAGACGGTCACAGCTTGTC<br>tttGAAGACTTcgaAAGCtgagaccGCTGGCACGACAGGTTTC                                                                 |
| A7_pJOG418  | JS1147_BsaI_pGBK_SDM_F<br>JS1148_BsaI_pGBK_SDM_R<br>JS1149_BsaI_pGBK2_SDM_F<br>JS1150_BsaI_pGBK2_SDM_R<br>JS1163_BsaI_pGBK3_SDM_F<br>JS1164_BsaI_pGBK3_SDM_R<br>JS1170_lacZ_Y2Hvec_CDS1F<br>JS1172_lacZ_pGBK_CDS1R | AAAACCAAAAGGTCcCCGCTGACTAGGGC<br>GCCCTAGTCAGCGGgGACCTTTTGGTTTT<br>AATACCTTCGTTGGaCTCCCTAACATGTA<br>TACATGTTAGGGAGtCCAACGAAGGTAT<br>ATTGGCCCCAATGGaGTCTCGGTGGGGTA<br>TACCCACCGAGACtCATTGGGGCCAAT<br>tttgaagacaaAATTaatgtgagaccAGACGGTCACAGCTTGTC<br>tttGAAGACTTgatcAAGCtgagaccGCTGGCACGACAGGTTTC |
| A8_pCK011   | JS1407_ccdB for Y2HCDS1ns<br>JS1408_ccdB for Y2HCDS1ns                                                                                                                                                             | tttgaagacATATgtagaccGACTGGCTGTGTATAAGGG<br>tttgaagacATAagcTCACGAAtgagaccTGAGACGTTGATCGGCACG                                                                                                                                                                                                     |
| A9_pCK012   | JS1407_ccdB for Y2HCDS1ns<br>JS1408_ccdB for Y2HCDS1ns                                                                                                                                                             | tttgaagacATATgtagaccGACTGGCTGTGTATAAGGG<br>tttgaagacATAagcTCACGAAtgagaccTGAGACGTTGATCGGCACG                                                                                                                                                                                                     |
| A10_pCK013  | JS761_AvrRps4_AATT_F<br>JS762_AvrRps4_TATG_R<br>JS763_TATG_BsaI_ccdB<br>JS764_ccdB-BsaI-GGTG-R<br>JS1180_pBRM-AvrRps4-F<br>JS1181_pBRM-AvrRps4-R<br>JS1194_pBRM-Avr-SDM<br>JS1195_pBRM-Avr-SDM                     | tttggtctcaattATGACTCGAATTTCAACCAG<br>tttggtctcaCATagcACCTCCACCCAATAGGGAT<br>tttatgagagaccTGAGACGTTGATC<br>ttcacctgagaccGACTGGCTGTGTAT<br>TTGGGTGGAGGTgcaATGagagaccTGAG<br>CTCAggtctctCATtgcACCTCCACCCAA<br>AGCCAGTCggtctcagCfTaacaaaagtgtattc<br>gaaatcaacttttgtAaGctgagaccGACTGGCT             |
| A11_pCK014  | JS1196_pBRM-Avr-SDM<br>JS1197_pBRM-Avr-SDM                                                                                                                                                                         | ACAGCCAGTCggtctcaTTCggaacaaaagtgtattct<br>agaaatcaactttgttccGAAtgagaccGACTGGCTGT                                                                                                                                                                                                                |
| A12_pCK015  | JS765_AvrRpt2_AATT_F<br>JS766_AvrRpt2_TATG_R<br>JS763_TATG_BsaI_ccdB<br>JS764_ccdB-BsaI-GGTG-R<br>JS1178_pBRM-AvrRpt2-F<br>JS1179_pBRM-AvrRpt2-R<br>JS1194_pBRM-Avr-SDM<br>JS1195_pBRM-Avr-SDM                     | tttggtctcaattATGAAAAATTGCTCCAGTTGC<br>tttggtctcaCATagaccaccGGTGGAAATCGGAAGCCACG<br>tttatgagagaccTGAGACGTTGATC<br>ttcacctgagaccGACTGGCTGTGTAT<br>TCCACCggtgctcaATGagagaccTGAG<br>CTCAggtctctCATtgaccaccGGTGGAA<br>AGCCAGTCggtctcagCfTaacaaaagtgtattc<br>gaaatcaacttttgtAaGctgagaccGACTGGCT       |
| B1_pCK016   | JS1196_pBRM-Avr-SDM<br>JS1197_pBRM-Avr-SDM                                                                                                                                                                         | ACAGCCAGTCggtctcaTTCggaacaaaagtgtattct<br>agaaatcaactttgttccGAAtgagaccGACTGGCTGT                                                                                                                                                                                                                |
| B2_pTRV2-GG | JS1300_TRV5'_F<br>JS1301_TRV5'_R<br>JS1302_TRV3'_F<br>JS1303_TRV3'_R                                                                                                                                               | tttggtctcaattAAGCTTGCATGCCTGCAGG<br>tttggtctcacataAGAATTCGGTAACCTTACTC<br>tttggtctcaggtgGGCCCCGGCATGTCCCCGA<br>tttggtctcaagcGTGGTGGTGGTGGTGGCT                                                                                                                                                  |
| B3_pTEI036  | TI195-LexA_35Smini as Pro+5U-F<br>TI196-LexA_35Smini as Pro+5U-R                                                                                                                                                   | tttgaagacatggagAGCTTGGGCTGCAGGTCCG<br><br>tttgaagacatcatTAGAGTCGACTAGCTTCAG                                                                                                                                                                                                                     |
| B4_pTEI042  | JS1339_GAl4_F<br>JS1375_Gal4EBE-R                                                                                                                                                                                  | tttgaagacaaggAGCTTGCATGCCGGTCCGAC<br>tttgaagacatCATtGGCTAGAGTCGACTAGCTTC                                                                                                                                                                                                                        |
| B5_pJOG644  | JS1339_GAl4_F<br>JS1340_GAl4_R                                                                                                                                                                                     | tttgaagacaaggAGCTTGCATGCCGGTCCGAC<br>tttgaagacaatGGCTAGAGTCGACTAGCTTC                                                                                                                                                                                                                           |
| B6_pTEI038  | TI189-pG10-90 as Pro+5U-F<br>TI190-pG10-90 as Pro+5U-R                                                                                                                                                             | tttgaagacatggagATAGTTTAACTGAAGGCGGG<br>tttgaagacatcatTCCGCCCGGAATTGGGG                                                                                                                                                                                                                          |
| B7_pJOG640  | JS1352_35Sf<br>JS1353_35Sr                                                                                                                                                                                         | tttgaagacaaGGAGGAATTCGAATCCCAC<br>tttgaagacaaATgTATCGATAATTGTAATG                                                                                                                                                                                                                               |
| B8_pJOG684  | JS1367.2_pAtUbi-F1<br>JS1368.2_pAtUbi-R1<br>JS1369.2_pAtUbi-F2<br>JS1370.2_pAtUbi-R2                                                                                                                               | tttgaagacatGGAGTGGGACCCACGGTTCA<br>tttgaagacatGACTTCGATCTAAGATTAACAG<br>tttgaagacatAGTCGATTTTCTGGGTTTGATC<br>tttgaagacatCATTGTTAATCAGAAAACTCAG                                                                                                                                                  |
| B9_pJOG603  | JS1204_Pro5U_Bs3_F<br>JS1205_Pro5U_Bs3_R                                                                                                                                                                           | tttgaagacaaggAGCAGCATTAAGGCACATCA<br>tttgaagacaaCATtAAATATATGTGCAACTAGGACT                                                                                                                                                                                                                      |
| B10_pTEI044 | JS1304_pRPS5a_F                                                                                                                                                                                                    | tttgaagacaaggagCTCAACTTTTGATTCC                                                                                                                                                                                                                                                                 |

| TI203-pRPS5a as Pro+5Uf-R |                                                                                                                                                                                          |                                                                                                                                                                                                                                                                                                                       |
|---------------------------|------------------------------------------------------------------------------------------------------------------------------------------------------------------------------------------|-----------------------------------------------------------------------------------------------------------------------------------------------------------------------------------------------------------------------------------------------------------------------------------------------------------------------|
| B11_pJOG301               | JS1074_pDD45_F<br>JS1075_pDD45_R                                                                                                                                                         | tttGAAGACAaggagAATGGTTATAATATATAGC<br>tttgaagacaaCATTATCTCTCTTTTGGG                                                                                                                                                                                                                                                   |
| B12_pAGM28521             | Ec1p1<br>Ec1p2<br>Ec1p3<br>Ec1p4<br>Ec1p5<br>Ec1p6<br>Ec1p7                                                                                                                              | tt gaagac aa ggagcatttgcgttggttatcattgcg<br>tt gaagac aa ggacacgaaggtttaacgtcgtgttacag<br>tt gaagac aa gtccaataggagcgctactgattc<br>tt gaagac aa tagcttagtggtgattaaagagtaataaaaag<br>tt gaagac aa gctagtaacgcctatcatgaattagctc<br>tt gaagac aa catttctcaacagattgataaggctg<br>tt gaagac aa cattattcttcttttggggttttgtttg |
| C1_pJOG299                | JS1068_pAP1_F<br>JS1069-pAP1_R                                                                                                                                                           | tttGAAGACaaGgaGAAAACACCAAATAAGAGAAG<br>tttgaagacaaCATTITTTGATCCTTTTTTAAG                                                                                                                                                                                                                                              |
| C2_pJOG298                | JS1055_Pro_ICU2_F<br>JS1056_Pro_ICU2_R                                                                                                                                                   | tttgaagacTTGgaGTTAATAGATGTTTAGTTTTTAT<br>tttgaagacaaCATTITTTACAAATCCGGTCAA                                                                                                                                                                                                                                            |
| C3_pJOG295                | JS1058_GILT1_UR<br>JS1059_GILT1_UR<br>JS1060_GILT2_UR<br>JS1061_GILT2_R                                                                                                                  | tttGAAGAcaaggagATGTCGCCTTAAAAAATGAATC<br>tttgaagacaaaCTCTTTTATTCGATTTTGTC<br>tttgaagacaaGAGtCCTCACGTGAAAATGTTAC<br>tttgaagacaaCATTGTTACTAAAAGAGTTTAAG                                                                                                                                                                 |
| C4_pJOG300                | JS1070_pAlbumin1_F<br>JS1071_pAlbumin1_R<br>JS1072_pAlbumin2_F<br>JS1073_pAlbumin2_R                                                                                                     | tttGAAGACAaggaGAAACTGGTTCATCACCC<br>tttgaagacaaAGtCCTCCAAAAACGAAAAGAAAATTA<br>tttgaagacaaGaCTCTTAGCCCTCAACTGAAAT<br>tttgaagacaaCATtCCGGAATATGGTTATA                                                                                                                                                                   |
| C5_pJOG025                | JG5_pAT_EDS1_1-1F<br>JG6_pAT_EDS1_1-1R<br>JG7_pAT_EDS1_1-2F<br>JG8_pAT_EDS1_1-2R<br>JG23_AtEDS1prom_sdm_1f<br>JG24_AtEDS1prom_sdm_1r<br>JG25_AtEDS1prom_sdm_2f<br>JG26_AtEDS1prom_sdm_2r | tttgaagacaaGGAGAGCTGTCTACATGAATCGAATC<br>tttgaagacaaCgTCGTCTCTTAAATATAGACTCCA<br>tttgaagacaaGAcGACTCCAAAGTCAAGTCAAA<br>aaagaagacaacattGATCTATATCTATTCTCTTTTCTT<br>TTCTTCTATACGAGtCCAAATCTGAAAAC<br>GTTTTCAGATTTGGaCTCGTATAGAAGAA<br>TTGCATTGAAATGGaCTCATGATGGGGTAT<br>ATACCCCATCATGAGtCCATTTCAATGCAA                  |
| C6_pJOG123                | JG5_pAT_EDS1_1-1F<br>JG71_pAT_EDS1_1-2R                                                                                                                                                  | tttgaagacaaGGAGAGCTGTCTACATGAATCGAATC<br>aaagaagacaaatggGATCTATATCTATTCTCTTTTC                                                                                                                                                                                                                                        |
| C7_pJOG026                | JG09_pAT_PAD4_1-1F<br>JG10_pAT_PAD4_1-1R<br>JG11_pAT_PAD4_1-2F<br>JG12_pAT_PAD4_1-2R                                                                                                     | tttgaagacaaGGAGAGCAATTACAAGATTGCTTTA<br>tttgaagacaaCcTCTTCAAAGTCTTACTTTAACATC<br>tttgaagacaaGAgGACGACTTAGCAAAGACCAAAACC<br>aaagaagacaacattATTGGATATCGAGTAGAGAGTTGCAGAAC                                                                                                                                               |
| C8_pJOG124                | JG09_pAT_PAD4_1-1F<br>JG72_pAT_PAD4_1-2R                                                                                                                                                 | tttgaagacaaGGAGAGCAATTACAAGATTGCTTTA<br>aaagaagacaacattggATTGGATATCGAGTAGAGAG                                                                                                                                                                                                                                         |
| C9_pJOG466                | JS1185_pAtSAG101-F<br>JS1186_pAtSAG101-P5U-R                                                                                                                                             | tttgaagacaaggagTGACGATGGTTGTTAAACGA<br>tttgaagacaaCATtGCGTGAGCTGGAATAGATCTGTGGAcAAGACAATAC                                                                                                                                                                                                                            |
| C10_pJOG467               | JS1185_pAtSAG101-F<br>JS1187_pAtSAG101-P5Uf-R                                                                                                                                            | tttgaagacaaggagTGACGATGGTTGTTAAACGA<br>tttgaagacaaATgGCGTGAGCTGGAATAGATCTGTGGAcAAGACAATAC                                                                                                                                                                                                                             |
| C11_pJOG010               | JG1_pPR1-1_F<br>JG2_pPR1-1_R<br>JG3_pPR1-2_F<br>JG4_pPR1-2_R                                                                                                                             | tttgaagacaaggagTTCATGCTAAACTATTTCTCG<br>tttgaagacaaGTCaTCTATTCAAATTTGAAT<br>tttgaagacaatGACTTAAATTAGAATCATGAAG<br>tttgaagacaacattTTTCTAAGTTGATAATGGTTAT                                                                                                                                                               |
| C12_pJOG648               | JS1333_AtS3Pro-F<br>JS1334_AtS3Pro-R                                                                                                                                                     | tttGAAGACATGGaGAAGATAAAATTTGCGAGTC<br>tttGAAGACAACATTTTTGCTATTTGTGTATGTTTTCTTG                                                                                                                                                                                                                                        |
| D1_pTEI067                | TI218_CER6_b_F<br>TI219_CER6_b_R                                                                                                                                                         | tttgaagacatGaCTCTTCATTAACCTCCTCTC<br>tttgaagacatCATtGTCGGAGAGTTTTAATGTATA                                                                                                                                                                                                                                             |
| D2_pTEI068                | TI210_CUE1_F<br>TI211_CUE1_R                                                                                                                                                             | tttgaagacatGGAGTACGTAACCTCTGTG<br>tttgaagacatCATtGTTGAGATCTGGAATCAGAAG                                                                                                                                                                                                                                                |
| D3_pTEI069                | TI212_BDG_F<br>TI213_BDG_R                                                                                                                                                               | tttgaagacatgGAGAGAATGGTATGTTGAGTAAAG<br>tttgaagacatCATtCTGTGGAGTTTGTGCTTTGTGeAAG                                                                                                                                                                                                                                      |
| D4_pTEI070                | TI214_GC1_F<br>TI215_GC1_R                                                                                                                                                               | tttgaagacatggAGGAATTGACGATGTAGAATTGTAG<br>tttgaagacatCATtTTTCTTGAGTAGTATTTTGAAG                                                                                                                                                                                                                                       |
| D5_pTEI071                | TI222_CAB3_Fa<br>TI223_CAB3_Ra<br>TI224_CAB3_F_b<br>TI225_CAB3_R_b                                                                                                                       | tttgaagacatgGAgTCTGAAGCTCGTAACATTGGC<br>tttgaagacatAGtCCACATGTTGCAAGTCTTTTGG<br>tttgaagacatGaCTCGAAATGCTTTGGCTGC<br>tttgaagacatCATTGAAACTTTTTGTGTTTTTTTTTTTTTTTTTTGGTG                                                                                                                                                |
| D6_pTEI073                | TI220_ATML12_F<br>TI221_ATML12_R                                                                                                                                                         | tttgaagacatGGagCACGTTGTATCCATGAAGCT<br>tttgaagacatCATTTTCAGGGAGAGAAATTGG                                                                                                                                                                                                                                              |
| D7_pCK019                 | JS1438_pEXP7_F<br>JS1439_pEXP7_R                                                                                                                                                         | tttgaagacatggagCTTTGCTTTCTCCGGTTC<br>tttgaagacatCATtctagctctttttttattc                                                                                                                                                                                                                                                |
| D8_pCK020                 | JS1440_Wox5-F<br>JS1441_Wox5-R                                                                                                                                                           | tttgaagacatGgaGtaaggctagacaacgtcc<br>tttgaagacatCATTgttcagatgtaaacctcc                                                                                                                                                                                                                                                |
| D9_pCK021                 | JS1448_pSOMBR-F1<br>JS1449_pSOMBR-R1<br>JS1450_pSOMBR-F2<br>JS1451_pSOMBR-R2<br>JS1452_pSOMBR-F3<br>JS1453_pSOMBR-R3                                                                     | tttgaagacatggagTCGTTGAAGATGCCTGGA<br>tttgaagacatAcACGTCATGCATTAACACC<br>tttgaagacatGTgTTCGTGAAGGCAACGGCA<br>tttgaagacatGtAGACAATGAAAGAGAGAGA<br>tttgaagacatCTaCTACCTCTTGCTCTAACAG<br>tttgaagacatCATTATCCTTACTCTCTTTAAGC                                                                                               |
| D10_pAGM1761              | Dmc1<br>Dmc2<br>Dmc3                                                                                                                                                                     | ttt gaagac aa ggagctatgagattactcgtgtatc<br>ttt gaagac aa gaccaacaatggctaacaatggc<br>ttt gaagac aa ggctatcatttctatgctttgattacatg                                                                                                                                                                                       |

|               |                                                                                                                |                                                                                                                                                                                                                                                                                                |
|---------------|----------------------------------------------------------------------------------------------------------------|------------------------------------------------------------------------------------------------------------------------------------------------------------------------------------------------------------------------------------------------------------------------------------------------|
|               | Dmc4                                                                                                           | tft gaagac aa gacacctgatcaagttcaagtttaatttg                                                                                                                                                                                                                                                    |
|               | Dmc5                                                                                                           | tft gaagac aa tgcacaatatatacaatttcgaggg                                                                                                                                                                                                                                                        |
|               | Dmc6                                                                                                           | tft gaagac aa agtagctcgatttgctctcgaggg                                                                                                                                                                                                                                                         |
| D11_pJOG020   | JS834_Parsleyubq4-2_F<br>JS835_Parsleyubq4-2_R                                                                 | tttGAAGACTTggagATTACGGATATGAATATAGGC<br>tttGAAGACTTcattGCTGCACATACATAACATATC                                                                                                                                                                                                                   |
| D12_pJOG575   | JS834_Parsleyubq4-2_F<br>JS1252_PcUbi_R                                                                        | tttGAAGACTTggagATTACGGATATGAATATAGGC<br>tttgaagacaaATGGCTGCACATACATAACATATC                                                                                                                                                                                                                    |
| E1_pJOG022    | JS856_UBI_F<br>JS857_UBI_R                                                                                     | tttGAAGACTtGAGGgtcgtgccctctctag<br>AAAGAAGACaaCATTctgcagaagtaacaccaaac                                                                                                                                                                                                                         |
| E2_pJOG213    | JS826_promSIEDS1-1_F<br>JG87_promSIEDS1_R                                                                      | TTTgaagacAAaggagTCTGATATGATCGGAATGATAAG<br>TTTgaagacAAcattTTTTGCTTCTAGCTGCTTA                                                                                                                                                                                                                  |
| E3_pJOG004    | JS826_promSIEDS1-1_F<br>JS827_promSIEDS1-1_R<br>JS828_promSIEDS2-1_F<br>JS829_promSIEDS2-1_R                   | TTTgaagacAAaggagTCTGATATGATCGGAATGATAAG<br>tttGAAGACaaCgTCCATAAGAACAAGAACAAGAG<br>tttGAAGACaaGAcGACATAAAGATGCAAGTG<br>TTTgaagacAAatggTTTTGCTTCTTAGCTGCTTA                                                                                                                                      |
| E4_pJOG535    | JS1204_Pro5U_Bs3_F<br>JS1205_Pro5U_Bs3_R                                                                       | tttgaagacaaggAGCAGCATTAAAGGCACATCA<br>tttgaagacaaCATtAAATATATGTGCAACTAGGACT                                                                                                                                                                                                                    |
| E5_pJOG577    | JS1204_Pro5U_Bs3_F<br>JS1253_pBs3_R                                                                            | tttgaagacaaggAGCAGCATTAAAGGCACATCA<br>ttgaagacaaATggTAAATATATGTGCAACTAGGAC                                                                                                                                                                                                                     |
| E6_pJOG638    | JS1323_SDMpBs3_F<br>JS1324_SDMpBs3_R                                                                           | TTATTATATAAACCGAACCATCTCTACAA<br>TTGTGAGGATGGTtCGGTTTATATAATAA                                                                                                                                                                                                                                 |
| E7_pJOG639    | JS1323_SDMpBs3_F<br>JS1324_SDMpBs3_R                                                                           | TTATTATATAAACCGAACCATCTCTACAA<br>TTGTGAGGATGGTtCGGTTTATATAATAA                                                                                                                                                                                                                                 |
| E8_pJOG170    | JS965_FP_Bpil_NT1_F<br>JS966_FP_Bpil_NT1_R                                                                     | tttgaagacaaccATGGTGAGCAAGGGCGAGG<br>tttgaagacAAcattgcagatTTGTACAGCTCGTCCATGC                                                                                                                                                                                                                   |
| E9_pJOG176    | JS969_FP_Bpil_CT_F<br>JS968_FP_Bpil_CDS1_R                                                                     | tttgaagacaattcggtGTGAGCAAGGGCGAGGAGC<br>tttgaagacAAaagTCATTGTACAGCTCGTCCATGC                                                                                                                                                                                                                   |
| E10_pJOG169   | JS965_FP_Bpil_NT1_F<br>JS966_FP_Bpil_NT1_R                                                                     | tttgaagacaaccATGGTGAGCAAGGGCGAGG<br>tttgaagacAAcattgcagatTTGTACAGCTCGTCCATGC                                                                                                                                                                                                                   |
| E11_pJOG175   | JS969_FP_Bpil_CT_F<br>JS968_FP_Bpil_CDS1_R                                                                     | tttgaagacaattcggtGTGAGCAAGGGCGAGGAGC<br>tttgaagacAAaagTCATTGTACAGCTCGTCCATGC                                                                                                                                                                                                                   |
| E12_pJOG168   | JS965_FP_Bpil_NT1_F<br>JS966_FP_Bpil_NT1_R                                                                     | tttgaagacaaccATGGTGAGCAAGGGCGAGG<br>tttgaagacAAcattgcagatTTGTACAGCTCGTCCATGC                                                                                                                                                                                                                   |
| F1_pJOG174    | JS969_FP_Bpil_CT_F<br>JS968_FP_Bpil_CDS1_R                                                                     | tttgaagacaattcggtGTGAGCAAGGGCGAGGAGC<br>tttgaagacAAaagTCATTGTACAGCTCGTCCATGC                                                                                                                                                                                                                   |
| F2_pJOG142    | JG79_YFP-NES/NLS_CT_F<br>JG80_YFP-NES_CT_R                                                                     | tttgaagacaattCGgctATGGTGAGCAAGGGCGAG<br>tttgaagacaaaagccttaaatcaagacctgcaagtttgaagacaagCTTGTACAGCTCGTCCAT<br>GCCG                                                                                                                                                                              |
| F3_pJOG143    | JG79_YFP-NES/NLS_CT_F<br>JG81_YFP-NLS_CT_R                                                                     | tttgaagacaattCGgctATGGTGAGCAAGGGCGAG<br>tttgaagacaaaagccttaAACCTTTCTCTTCTTCTTAGG                                                                                                                                                                                                               |
| F4_pJOG140    | JG77_NES_NT1_F<br>JG78_NES_NT1_R                                                                               | ccATGGCTTCTcttctctcaaaccttcaggtcttgattAGCgc<br>CATTgcGCTaatatcaagacctgcaagtttgagacaagAGAAGCC                                                                                                                                                                                                   |
| F5_pJOG141    | JG75_NLS_NT1_F<br>JG76_NLS_NT1_R                                                                               | ccATGGCTAGCCCACCGAAGAAGAAGCGGAAGTCAAGCgc<br>CATTgcGCTGACCTTCCGCTTCTTCTTCCGTTGGGCTAGCC                                                                                                                                                                                                          |
| F6_pJOG824    | JS1513_NLS-F<br>JS1514_NLS-R                                                                                   | fTCGgctcagccCCTAAGAAGAAGAGAAAGGTTGA<br>aagcTCAAACCTTTCTCTTCTTCTTAGGgctcagc                                                                                                                                                                                                                     |
| F7_pAGM16456  | Primu1<br>Primu11<br>Primu20<br>Primu22                                                                        | tt ggtctc a ACAT ccatgggcagccatcaccaccatcacc<br>tt ggtctc a ACAA catcccgtgctgatgggtgctgctgctg<br>tt ggtctc a ACAT gatgtcacaactcccactctagagcgcttgac<br>tt ggtctc a ACAA catt ccgtcagctgcaagcgcctctagaggtgg                                                                                      |
| F8_pAGM16467  | Primu1<br>Primu11<br>Primu21<br>Primu23                                                                        | tt ggtctc a ACAT ccatgggcagccatcaccaccatcacc<br>tt ggtctc a ACAA catcccgtgctgatgggtgctgctgctg<br>tt ggtctc a ACAT gatgtcagactgaagcttgcctgctgctgac<br>tt ggtctc a ACAA catt ccgtgctgctgagccagcaagcttc                                                                                           |
| F9_pAGM16418  | Primu1<br>Primu2<br>Primu16<br>Primu17<br>Primu5<br>Primu6                                                     | tt ggtctc a ACAT ccatgggcagccatcaccaccatcacc<br>tt ggtctc a ACAA tccgctgctgatgggtgctgctgctg<br>tt ggtctc a ACAT cggactacaactcccactctagagcgcttgac<br>tt ggtctc a ACAA catcccgtcagctgcaagcgcctctagaggtgg<br>tt ggtctc a ACAT gatggtagcaagggcgagga<br>tt ggtctc a ACAA cattgaacctgtacagctgctccatg |
| F10_pAGM16429 | Primu1<br>Primu2<br>Primu18<br>Primu19<br>Primu5<br>Primu6                                                     | tt ggtctc a ACAT ccatgggcagccatcaccaccatcacc<br>tt ggtctc a ACAA tccgctgctgatgggtgctgctgctg<br>tt ggtctc a ACAT cggactagcactgaagcttgcctgctgac<br>tt ggtctc a ACAA catcccgtgctgctgagccagcaagcttc<br>tt ggtctc a ACAT gatggtagcaagggcgagga<br>tt ggtctc a ACAA cattgaacctgtacagctgctccatg        |
| F11_pJOG642   | JS1341_HAtag_F<br>JS1342_HAtag_R<br>JS1343_tagRFP-F<br>JS1344_tagRFP-R<br>JS1345_tagRFP2-F<br>JS1346_tagRFP2-R | tttgaagacaaCCATGTACCCATACGATGT<br>tttgaagacaaACAGCAGCTCTAGTGGCGT<br>tttgaagacaactGTGTCTAAGGGCGAAGAGC<br>tttgaagacaaCcTCGTATGTGGTGACTCTC<br>tttgaagacaaGAgGACGGGGCGGTGCTGAC<br>tttgaagacaaCATtgcagcagaCTTGTACAGCTCGTCCATG                                                                       |
| F12_pJOG317   | JS1080_1Strep_F<br>JS1081_1Strep_CT_R                                                                          | tttgaagacaacgctTCTGCTTGGTACACCCAC<br>tttgaagacaaaagcTATTTTTCAAATTGAGGATG                                                                                                                                                                                                                       |

|              |                           |                                                  |
|--------------|---------------------------|--------------------------------------------------|
|              | JS1082_4xmyc_CT1_F        | tftgaagacaaTTCGGAACAAAAGTTGATC                   |
|              | JS1083_4xmyc_R            | tftgaagacaaaagcggcAAGGTCTCTTCAGAAATAAG           |
| G1_pJOG331   | JS1078_6xHA_CT1_F         | tftgaagacaaTTCGTACCCATACGATGTTTC                 |
|              | JS1079_6xHA_R             | tftgaagacaaaagcGGCGTAATCTGGAACGTC                |
|              | JS1080_1Strep_F           | tftgaagacaaacgtTCTGCTTGGTCACACCCAC               |
|              | JS1081_1Strep_CT_R        | tftgaagacaaaagcTATTTTTCAAAATTGAGGATG             |
| G2_pJOG658   | JS1341_HAtag_F            | tftgaagacaaCCATGTACCCATACGATGT                   |
|              | JS1342_HAtag_R            | tftgaagacaaACAGCAGCTCTAGTGGCGT                   |
|              | JS1362_LUC-F              | tftgaagacaactgtgtctgctGAGGACGCCAAAAACATAAAG      |
|              | JS1363_LUC-R              | tftgaagacaaCATtgcggcactagcCAATTTGGACTTCCGCC      |
| G3_pJOG659   | JS1356_REN-F              | tftgaagacaatTCGgctACTTCGAAAAGTTTATGATC           |
|              | JS1357_REN5pr-R           | tftgaagacaaAGcCTTTTACTTTGACAAATTC                |
|              | JS1358_REN3pr-F           | tftgaagacaaGcTTCATTTTTTCGCAAGAAG                 |
|              | JS1359_REN3pr-R           | tftgaagacaagcagaTTGTTTCAATTTTTGAGAAGCTC          |
|              | JS1360_3xHA-F             | tftgaagacaactgctgccTACCCATACGATGTTCCCTG          |
|              | JS1361_3xHA-R             | tftgaagacaaaagctagcAGCGTAATCTGGAACGTC            |
| G4_pJOG643   | JS1349_GR-F               | tftgaagacaaccATGATTCAGCAAGCCACTGC                |
|              | JS1350_GR-R               | tftgaagacaaCATtgcggcagaagcTTTTTGTATGAAACAGAAGCTT |
| G5_pCK032    | JS1454_GRasCT-F           | tftgaagacatTTCGgctgcaTCTGCTATTTCAGCAAGCCACTGC    |
|              | JS1455_GRasCT-R           | tftgaagacTAaagcTCATTTTTGATGAAACAGAAGCTT          |
| G6_pTEI037   | JS1349_GR-F               | tftgaagacaaccATGATTCAGCAAGCCACTGC                |
|              | TI201-GR as NT1-R         | tftgaagacaagcagaagcTTTTTGTATGAAACAGAAGC          |
| G7_pTEI041   | TI199-ER as NT1 PCR-F     | tftgaagacatccATGTCTGCTGGAGACATG                  |
|              | TI200-ER as NT1 PCR-R     | tftgaagacaaCATtgcggcagaagcGACTGTGGCAGGGAAACC     |
|              | TI205-SDM-XVE-F           | TCCTGATGATTGGcCTCGTCTGGCGCT                      |
|              | TI206-SDM-XVE-R           | AGCGCCAGACGAGgCCAATCATCAGGA                      |
| G8_pCK025    | JS1446_ERasCT1-R          | tftgaagacatAAGCCTAGACTGTGGCAGGGAAAC              |
|              | JS1447_ERasCT1-F          | tftgaagacatTcggctccaTCTGCTGGAGACATGAGAG          |
| G9_pAGM16841 | Stonos1                   | tt gaagac aa CTCA ttcgtagtcaagcagatcgtcaaac      |
|              | Stonos3                   | tt gaagac aa CTCG agcgtcgatctagtaacatagatg       |
| G10_pJOG173  | JS967_FP_Bpil_CDS1_F      | tftgaagacaaaATGGTGAGCAAGGGCGAGG                  |
|              | JS968_FP_Bpil_CDS1_R      | tftgaagacAAaagcTCATTTGTACAGCTCGTCCATGC           |
| G11_pJOG172  | JS967_FP_Bpil_CDS1_F      | tftgaagacaaaATGGTGAGCAAGGGCGAGG                  |
|              | JS968_FP_Bpil_CDS1_R      | tftgaagacAAaagcTCATTTGTACAGCTCGTCCATGC           |
| G12_pJOG171  | JS967_FP_Bpil_CDS1_F      | tftgaagacaaaATGGTGAGCAAGGGCGAGG                  |
|              | JS968_FP_Bpil_CDS1_R      | tftgaagacAAaagcTCATTTGTACAGCTCGTCCATGC           |
| H1_pJOG021   | JS860_hpt_F               | TTTgaagacAAaATGAAAAAGCCTGAACTCAC                 |
|              | JS861_hpt_R               | TTTgaagacAAaagcCTATTCCTTTGCCCCGGA                |
| H2_pJOG351   | JS1092_nptII_L0_F         | tftgaagacaaaATGATTGAACAAGATGGATTG                |
|              | JS1093_nptII_L0_R         | tftgaagacaaaagcTCAGAAGAAGCTCGTCAAGAAG            |
| H3_pJOG031   | JS858_AvrRps4_CDS1ns_F    | tttGAAGACaaAATGACTCGAATTTCAACCAG                 |
|              | JS859_AvrRps4_CDS1ns_R    | TTTgaagacAAcgaagcTTGGTTGATTCTGCGaTCTTCG          |
| H4_pJOG536   | JS1126_INTACT_NTF_F       | tftgaagacaaaATGGATCATTTCAGCGAAAACCAC             |
|              | JS1127_INTACT_NTF_R       | tftgaagacaaaagcctaAGATCCACCAGTATCCTC             |
| H5_pJOG545   | Assembly from TALE Kit    | n/a                                              |
| H6_pCK039    | Assembly from TALE Kit    | n/a                                              |
| H7_pCK038    | Assembly from TALE Kit;   |                                                  |
|              | JS1522_TALE-Cter-F        | tftggtctcaacatTCGGCCCCGACCCTGCTTTAG              |
|              | JS1523_TALE-Cter-R        | tftggtctcaacaacgaACCCTGTGGCAGTAACTCC             |
| H8_pJOG641   | JS1335_GVG_F              | tftgaagacaaaATGGCAGATCCAATGAAGCTACTaTCTTC        |
|              | JS1336_GVG_R              | tftgaagacaaaagcTCATTTTTGTATGAAACAGAAG            |
| H9_pTEI039   | TI191-XVE Teil1 as CDS1-F | tftgaagacataATGAAAAGCGTTAACGGC                   |
|              | TI192-XVE Teil1 as CDS1-R | tftgaagactaGgGACCAATCATCAGGATCTC                 |
|              | TI193-XVE Teil2 as CDS1-F | tftgaagacatTCcCGTCTGGCGCTCCATGGAG                |
|              | TI194-XVE Teil2 as CDS1-R | tftgaagacataagCTCAGACTGTGGCAGGGAA                |
| H10_pCK026   | JS1417_Bs3F               | tftgaagacataATGATGAATCAGAATTGCTT                 |
|              | JS1418_Bs3DR              | tftgaagacatAcAGACCATCTCCCCCTTC                   |
|              | JS1419_Bs3F2              | tftgaagacatCTgTATGCAGTTGGATTTACAG                |
|              | JS1420_Bs3R2              | tftgaagactaaagcCTACATTTGTCTTTCCAAATTTTGG         |
| H11_pJOG822  | JS967_FP_Bpil_CDS1_F      | tftgaagacaaaATGGTGAGCAAGGGCGAGG                  |
|              | JS1184_YFP-NLS-R          | tftgaagacaaaagcTTATCCCTCAACCTTTTCTC              |
| H12_pJOG587  | JS1271_GUS_F              | tftgaagacaaaagcTTACGTCTGTAGAAAACCC               |
|              | JS983_GUS_CDS1_R          | tftgaagacaaaagcTCATTTGTTTGCCTCCCTGC              |
| pJOG947      | JS1649_GW_NT1-CDS1nsF     | tftgaagacatctcaCCATACAAGTTTGTACAAAAAAGC          |
|              | JS1650_GW_NT1-CDS1nsR     | tftgaagactactcgCgaAACCACTTTGTACAAGAAAAGCTG       |
| pJOG956      | JS1649_GW_NT1-CDS1nsF     | tftgaagacatctcaCCATACAAGTTTGTACAAAAAAGC          |
|              | JS1651_GW_NT1-CDS1R       | tftgaagactactcgaagcAACCACTTTGTACAAGAAAAGCTG      |
