# Supplementary material for: Peripheral infrastructure vectors and an extended set of plant parts for the Modular Cloning system
Source: PubMed Central journal article supplement (PMC5976141; doi:10.1371/journal.pone.0197185), 2018-05-30
Supplement: pone.0197185.s007.pdf [file pone.0197185.s007.pdf]

**Table S2: Modular cloning-compatible vectors for specialized applications**

| <b>GG-GW entry / MoClo-&gt;GW shuttle vectors:</b> |                 |                                            |                        |                |
|----------------------------------------------------|-----------------|--------------------------------------------|------------------------|----------------|
| name                                               | for module type | description <sup>1</sup>                   | selection <sup>2</sup> | plate position |
| pJOG130                                            | CDS1            | attL1-[AATG-Bsal-ccdB/cat-Bsal-GCTT]-attL2 | Kan, <i>ccdB</i>       | A1             |
| pJOG131                                            | CDS1ns          | attL1-[AATG-Bsal-ccdB/cat-Bsal-TTCG]-attL2 | Kan, <i>ccdB</i>       | A2             |

  

| <b>MoClo modules for Gateway destination vector construction:</b> |                 |                                          |                   |                |
|-------------------------------------------------------------------|-----------------|------------------------------------------|-------------------|----------------|
| name                                                              | for module type | description                              | selection         | plate position |
| pJOG387                                                           | CDS1            | Bsal_AATG[attR1-ccdB/cat-attR2]GCTT_Bsal | Spec, <i>ccdB</i> | A3             |
| pJOG267                                                           | CDS1ns          | Bsal_AATG[attR1-ccdB/cat-attR2]TTCG_Bsal | Spec, <i>ccdB</i> | A4             |
| pJOG562                                                           | Pro->CDS1ns     | Bsal_GGAG[attR1-ccdB/cat-attR2]TTCG_Bsal | Kan, <i>ccdB</i>  | A5             |
| pJOG947 <sup>3</sup>                                              | NT1->CDS1ns     | Bsal_CCAT[attR1-ccdB/cat-attR2]TTCG_Bsal | Spec, <i>ccdB</i> | n/a            |
| pJOG956 <sup>3</sup>                                              | NT1->CDS1       | Bsal_CCAT[attR1-ccdB/cat-attR2]GCTT_Bsal | Spec, <i>ccdB</i> | n/a            |

  

| <b>Y2H vectors:</b> |                 |                                                                                                                              |                  |                |
|---------------------|-----------------|------------------------------------------------------------------------------------------------------------------------------|------------------|----------------|
| name                | for module type | description                                                                                                                  | selection        | plate position |
| pJOG417             | CDS1            | pGAD derivative; pADH1:NLS <sub>SV40</sub> -AD <sub>GAL4</sub> -HA-[AATG-Bsal_lacZ_Bsal-GCTT]-tADH                           | Amp, lacZ        | A6             |
| pJOG418             | CDS1            | pGBK derivative; pADH1:DBD <sub>GAL4</sub> -myc-[AATG-Bsal_lacZ_Bsal-GCTT]-tADH                                              | Kan, lacZ        | A7             |
| pCK011              | CDS1ns          | pGAD derivative; pADH1:NLS <sub>SV40</sub> -AD <sub>GAL4</sub> -HA-[AATG-Bsal_ccdB-cat(Cm <sup>R</sup> )_Bsal-TTCG TGA]-tADH | Amp, <i>ccdB</i> | A8             |
| pCK012              | CDS1ns          | pGBK derivative; pADH1:DBD <sub>GAL4</sub> -myc-[AATG-Bsal_lacZ_Bsal-TTCG TGA]-tADH                                          | Kan, <i>ccdB</i> | A9             |

  

| <b>Bacterial type-III secretion plasmids:</b> |                 |                                                                   |                   |                |
|-----------------------------------------------|-----------------|-------------------------------------------------------------------|-------------------|----------------|
| name                                          | for module type | description                                                       | selection         | plate position |
| pCK013                                        | CDS1            | plac:AvrRps4 <sub>1-134</sub> [AATG-Bsal_ccdB/cat_Bsal-GCTT]      | Gent, <i>ccdB</i> | A10            |
| pCK014                                        | CDS1ns          | plac:AvrRps4 <sub>1-134</sub> [AATG-Bsal_ccdB/cat_Bsal-TTCG]3xmyc | Gent, <i>ccdB</i> | A11            |
| pCK015                                        | CDS1            | plac:AvrRpt2 <sub>1-100</sub> [AATG-Bsal_ccdB/cat_Bsal-GCTT]      | Gent, <i>ccdB</i> | A12            |
| pCK016                                        | CDS1ns          | plac:AvrRpt2 <sub>1-100</sub> [AATG-Bsal_ccdB/cat_Bsal-TTCG]3xmyc | Gent, <i>ccdB</i> | B1             |

  

| <b>Virus-induced gene silencing vector:</b> |                                                          |                   |                |  |
|---------------------------------------------|----------------------------------------------------------|-------------------|----------------|--|
| name                                        | description                                              | selection         | plate position |  |
| pTRV2-GG                                    | p35S:TRV-RNA2(5') [TATG-Bsal_ccdB/cat-Bsal-GGTG]RNA2(3') | Spec, <i>ccdB</i> | B2             |  |

<sup>1</sup> – fragment indicated as [ ] is exchanged for a respective insert during Golden Gate cloning

<sup>2</sup> – Amp = Ampicillin or Carbenicillin; Kan = Kanamycin; Gent – Gentamicin; Spec = Spectinomycin; *ccdB* = presence of *ccdB* cassette, resistance to chloramphenicol, propagation in *ccdB* survival cells or strain DB3.1 required, lacZ = lacZ as marker gene, blue-white selection.

<sup>3</sup> – these modules are not contained in Addgene Kit # 1000000135.
