# Supplementary material for: Peripheral infrastructure vectors and an extended set of plant parts for the Modular Cloning system
Source: PubMed Central journal article supplement (PMC5976141; doi:10.1371/journal.pone.0197185), 2018-05-30
Supplement: pone.0197185.s008.pdf [file pone.0197185.s008.pdf]

**Table S3: Modular Cloning Level 0 modules**

All plasmids carry a Spectinomycin resistance gene as selection marker. Module type refers to the 4 bp overhangs created by *BsaI* excision as according to Engler et al. 2014 [1].

| plasmid name                                       | module type | description                                                                                                                         | plate pos. |
|----------------------------------------------------|-------------|-------------------------------------------------------------------------------------------------------------------------------------|------------|
| <b>Promoter modules: Pro, Pro+5U and Pro+5U(f)</b> |             |                                                                                                                                     |            |
| pTEI036 <sup>GB</sup>                              | Pro+5U      | Fusion of LexA operator and 35S minimal promoter; inducible by the synthetic TF XVE (Estradiol-inducible) [2]                       | B3         |
| pTEI042 <sup>GB</sup>                              | Pro+5U      | Fusion of GAL4 <sub>UAS</sub> and 35S minimal promoter; inducible by the synthetic TF GVG (Dex-inducible) [3]                       | B4         |
| pJOG644 <sup>GB</sup>                              | Pro+5U(f)   |                                                                                                                                     | B5         |
| pTEI038 <sup>GB</sup>                              | Pro+5U      | Promoter G10-90 (strong, constitutive in Arabidopsis) [4]                                                                           | B6         |
| pJOG640 <sup>GB</sup>                              | Pro+5U(f)   | ~ 1300 bp fragment of the 35S promoter (Cauliflower mosaic virus) and 5'UTR $\Omega$ (Tobacco Mosaic Virus) [5-7]                   | B7         |
| pJOG684* <sup>GB</sup>                             | Pro+5U      | ~ 800 bp fragment upstream of Arabidopsis <i>UBQ10</i> (At4g05320) (strong, constitutive promoter) [8]                              | B8         |
| pJOG603                                            | Pro+5U      | ~ 1700 bp upstream of Arabidopsis <i>RPS5a</i> (At3g11940) (strong, constitutive promoter in Arabidopsis) [9]                       | B9         |
| pTEI044                                            | Pro+5U(f)   |                                                                                                                                     | B10        |
| pJOG301                                            | Pro+5U      | ~ 1000 bp upstream of Arabidopsis <i>DD45/EC1.2</i> (At2g21740) (egg cell-specific promoter) [10, 11]                               | B11        |
| pAGM28521 <sup>GB</sup>                            | Pro+5U      | Egg cell-specific promoter: Fusion of the <i>EC1.2</i> enhancer with <i>EC1.1</i> promoter ( <i>EC1.2en-EC1.1p</i> ) [11]           | B12        |
| pJOG299                                            | Pro+5U      | ~ 1400 bp upstream of Arabidopsis <i>AP1</i> (At1g69120) (flower meristem-specific promoter) [12]                                   | C1         |
| pJOG298 <sup>GB</sup>                              | Pro+5U      | ~ 600 bp fragment upstream of Arabidopsis <i>ICU2</i> (At5g67100) (dividing cell-specific promoter) [13]                            | C2         |
| pJOG295* <sup>GB</sup>                             | Pro+5U      | ~ 2100 bp fragment upstream of Arabidopsis <i>GILT</i> (At4g12960)                                                                  | C3         |
| pJOG300* <sup>GB</sup>                             | Pro+5U      | ~ 350 bp fragment upstream of Arabidopsis At1g66850                                                                                 | C4         |
| pJOG025                                            | Pro+5U      | ~ 1000 bp fragment upstream of Arabidopsis <i>EDS1</i> (At3g48090) [14]                                                             | C5         |
| pJOG123                                            | Pro+5U(f)   |                                                                                                                                     | C6         |
| pJOG026                                            | Pro+5U      | ~1200 bp fragment upstream of Arabidopsis <i>PAD4</i> (At3g52430) [15,                                                              | C7         |
| pJOG124                                            | Pro+5U(f)   | 16]                                                                                                                                 | C8         |
| pJOG466 <sup>GB</sup>                              | Pro+5U      | ~ 1000 bp fragment upstream of Arabidopsis <i>SAG101</i> (At5g14920) [17]                                                           | C9         |
| pJOG467 <sup>GB</sup>                              | Pro+5U(f)   |                                                                                                                                     | C10        |
| pJOG010 <sup>GB</sup>                              | Pro+5U      | ~ 1200 bp fragment upstream of Arabidopsis <i>PR1</i> (At2g14610) (pathogen-responsive promoter) [18]                               | C11        |
| pJOG648                                            | Pro+5U      | ~ 550 bp fragment upstream of Arabidopsis <i>SESA3/AtS2S3</i> (At4g27160) (seed-specific promoter) [19]                             | C12        |
| pTEI067* <sup>GB</sup>                             | Pro+5U      | ~ 1500 bp fragment upstream of Arabidopsis <i>CER6</i> (At1g68530) (epidermis-specific promoter) [20]                               | D1         |
| pTEI068* <sup>GB</sup>                             | Pro+5U      | ~ 2000 bp fragment upstream of Arabidopsis <i>CUE1</i> (At5g33320) (mesophyll-specific promoter) [21]                               | D2         |
| pTEI069 <sup>GB</sup>                              | Pro+5U      | ~ 1000 bp fragment upstream of Arabidopsis <i>BODYGUARD1</i> (At1g64670) (epidermis-specific promoter) [22]                         | D3         |
| pTEI070 <sup>GB</sup>                              | Pro+5U      | ~ 1000 bp fragment upstream of Arabidopsis At1g22690 (" <i>pGCI</i> ") (guard cell-specific promoter) [23]                          | D4         |
| pTEI071 <sup>GB</sup>                              | Pro+5U      | ~ 1000 bp fragment upstream of Arabidopsis <i>CAB3</i> (At1g29910) (mesophyll-specific promoter) [24]                               | D5         |
| pTEI073* <sup>GB</sup>                             | Pro+5U      | ~ 2000 bp fragment upstream of Arabidopsis <i>ALMT12</i> (At4g17585) (guard cell-specific promoter) [25]                            | D6         |
| pCK019* <sup>GB</sup>                              | Pro+5U      | ~ 750 bp fragment upstream of Arabidopsis <i>EXP7</i> (At1g12560) (root hair-specific promoter) [26, 27]                            | D7         |
| pCK020*                                            | Pro+5U      | ~ 2300 bp fragment upstream of Arabidopsis <i>WOX5</i> (At3g11260) (root stem cell niche / quiescent center-specific promoter) [28] | D8         |

| plasmid name                                                   | module type | description                                                                                                                       | plate pos. |
|----------------------------------------------------------------|-------------|-----------------------------------------------------------------------------------------------------------------------------------|------------|
| <b>Promoter modules: Pro, Pro+5U and Pro+5U(f) [continued]</b> |             |                                                                                                                                   |            |
| pCK021* <sup>GB</sup>                                          | Pro+5U      | ~ 3300 bp fragment upstream of Arabidopsis <i>SOMBRERO</i> (At1g79580) (root cap-specific promoter) [29, 30]                      | D9         |
| pAGM1761 <sup>GB</sup>                                         | Pro         | ~ 3000 bp fragment upstream of Arabidopsis <i>AtDMC1</i> (At3G22880) (meiosis-specific promoter) [31]                             | D10        |
| pJOG020 <sup>GB</sup>                                          | Pro+5U      | ~ 1000 bp fragment upstream of parsley <i>Ubi4-2</i> [32]                                                                         | D11        |
| pJOG575 <sup>GB</sup>                                          | Pro+5U(f)   |                                                                                                                                   | D12        |
| pJOG022 <sup>GB</sup>                                          | Pro+5U      | ~ 1500 bp fragment of the <i>Zea mays</i> Ubiquitin promoter + UTR [33]                                                           | E1         |
| pJOG213 <sup>GB</sup>                                          | Pro+5U      | ~ 1200 bp fragment upstream of <i>SIEDS1</i> (Solyc060g071280)                                                                    | E2         |
| pJOG004 <sup>GB</sup>                                          | Pro+5U(f)   |                                                                                                                                   | E3         |
| pJOG535 <sup>GB</sup>                                          | Pro+5U      | ~ 1000 bp fragment of the <i>CaBs3</i> promoter (TALE = AvrBs3-inducible promoter) [34]                                           | E4         |
| pJOG577 <sup>GB</sup>                                          | Pro+5U(f)   |                                                                                                                                   | E5         |
| pJOG638 <sup>GB</sup>                                          | Pro+5U      | ~ 1000 bp fragment of the <i>CaBs3</i> promoter (TALE = AvrBs3-inducible promoter); weaker variant; mutation in TALE-binding site | E6         |
| pJOG639 <sup>GB</sup>                                          | Pro+5U(f)   |                                                                                                                                   | E7         |

| plasmid name                   | module type | description                                                                               | plate pos. |
|--------------------------------|-------------|-------------------------------------------------------------------------------------------|------------|
| <b>Tag modules: NT1 and CT</b> |             |                                                                                           |            |
| pJOG170 <sup>GB</sup>          | NT1         | CDS of mEGFP variant of GFP ( <i>Aequorea victoria</i> ) [35, 36]                         | E8         |
| pJOG176 <sup>GB</sup>          | CT          |                                                                                           | E9         |
| pJOG169 <sup>GB</sup>          | NT1         | CDS of mTRQ variant of GFP ( <i>Aequorea victoria</i> ) [35, 37]                          | E10        |
| pJOG175 <sup>GB</sup>          | CT          |                                                                                           | E11        |
| pJOG168 <sup>GB</sup>          | NT1         | CDS of mVenus variant of GFP ( <i>Aequorea victoria</i> ) [35, 38]                        | E12        |
| pJOG174 <sup>GB</sup>          | CT          |                                                                                           | F1         |
| pJOG142 <sup>GB</sup>          | CT          | mYFP-NES; CDS of mYFP fused to the PKI nuclear export signal [39, 40]                     | F2         |
| pJOG143 <sup>GB</sup>          | CT          | mYFP-NLS; CDS of mYFP fused to SV40 nuclear localization signal [40, 41]                  | F3         |
| pJOG140 <sup>GB</sup>          | NT1         | NES; PKI nuclear export signal [39]                                                       | F4         |
| pJOG141 <sup>GB</sup>          | NT1         | NLS; SV40 nuclear localization signal [41]                                                | F5         |
| pJOG824 <sup>GB</sup>          | CT          |                                                                                           | F6         |
| pAGM16456 <sup>GB</sup>        | NT1         | 6xHis-NES(Rev); fusion of 6xHis tag with nuclear export signal (NES from Rev, HIV-1) [39] | F7         |
| pAGM16467 <sup>GB</sup>        | NT1         | 6xHis-NES(PKI); fusion of 6xHis tag with nuclear export signal (NES from PKI) [39]        | F8         |
| pAGM16418* <sup>GB</sup>       | NT1         | 6xHis-NES(Rev)-GFP; fusion of 6xHis tag with NES (Rev) and GFP                            | F9         |
| pAGM16429* <sup>GB</sup>       | NT1         | 6xHis-NES(PKI)-GFP ; fusion of 6xHis tag with NES (PKI) and GFP                           | F10        |
| pJOG642 <sup>GB</sup>          | NT1         | 3 x HA tag fused to the tagRFP-T CDS [42]                                                 | F11        |
| pJOG317 <sup>GB</sup>          | CT          | 4 x myc tag fused to Twin-Strep tag [43]                                                  | F12        |
| pJOG331 <sup>GB</sup>          | CT          | 6 x HA tag fused to Twin-Strep tag [43]                                                   | G1         |
| pJOG658 <sup>GB</sup>          | NT1         | 3 x HA tag fused to firefly ( <i>Photinus pyralis</i> ) Luciferase CDS [44]               | G2         |
| pJOG659 <sup>GB</sup>          | CT          | Renilla ( <i>Renilla reniformis</i> ) luciferase CDS fused to a 3 x HA tag [45]           | G3         |
| pJOG643 <sup>GB</sup>          | NT1         | Hormone-binding domain of the rat glucocorticoid receptor [3, 46]                         | G4         |
| pCK032 <sup>GB</sup>           | CT          |                                                                                           | G5         |
| pTEI037* <sup>GB</sup>         | NT1         | Hormone-binding domain of the rat glucocorticoid receptor fused to mEGFP [3, 36]          | G6         |
| pTEI041                        | NT1         | Hormone-binding domain and regulatory sequences of the human estrogen receptor [2, 47]    | G7         |
| pCK025                         | CT          |                                                                                           | G8         |

| plasmid name                        | module type | description                                                                                                                      | plate pos. |
|-------------------------------------|-------------|----------------------------------------------------------------------------------------------------------------------------------|------------|
| <b>STOP module: CT -&gt; 3U+ter</b> |             |                                                                                                                                  |            |
| pAGM16841 <sup>GB</sup>             | CT-3Uter    | STOP codon and <i>nos</i> terminator; to fuse a STOP codon to CDS1ns modules while simultaneously adding a <i>nos</i> terminator | G9         |

| plasmid name                              | module type | description                                                                                     | plate pos. |
|-------------------------------------------|-------------|-------------------------------------------------------------------------------------------------|------------|
| <b>CDS modules: CDS1, CDS1ns and CDS2</b> |             |                                                                                                 |            |
| pJOG173 <sup>GB</sup>                     | CDS1        | CDS of mEGFP variant of GFP ( <i>Aequorea victoria</i> ) [35, 36]                               | G10        |
| pJOG172 <sup>GB</sup>                     | CDS1        | CDS of mTRQ variant of GFP ( <i>Aequorea victoria</i> ) [35, 37]                                | G11        |
| pJOG171 <sup>GB</sup>                     | CDS1        | CDS of mVenus variant of GFP ( <i>Aequorea victoria</i> ) [35, 38]                              | G12        |
| pJOG021                                   | CDS1        | Hygromycin phosphotransferase ( <i>hpt</i> ) CDS ( <i>Escherichia coli</i> ) [48]               | H1         |
| pJOG351 <sup>GB</sup>                     | CDS1        | Neomycin phosphotransferase ( <i>nptII</i> ) CDS ( <i>Escherichia coli</i> ) [48]               | H2         |
| pJOG031                                   | CDS1        | <i>AvrRps4</i> ( <i>Pseudomonas syringae</i> pv. <i>pisii</i> ) [49]                            | H3         |
| pJOG536*                                  | CDS1        | "Nuclear targeting factor" [RanGAP1(WPP)-GFP-BLRP] of the INTACT system [50]                    | H4         |
| pJOG545                                   | CDS1        | <i>AvrBs3</i> ( <i>Xanthomonas campestris</i> pv. <i>vesicatoria</i> ) [51]                     | H5         |
| pCK039* <sup>GB</sup>                     | CDS1        | dTALE binding to <i>Bs3</i> promoter ( <i>Capsicum annuum</i> ) as transactivator               | H6         |
| pCK038* <sup>GB</sup>                     | CDS1ns      |                                                                                                 | H7         |
| pJOG641 <sup>GB</sup>                     | CDS1        | GVG synthetic TF: GAL4-VP16-GR (inducible expression, dexamethasone) [3]                        | H8         |
| pTEI039                                   | CDS1        | XVE synthetic TF: LexA-VP16-ER (inducible expression, estradiol) [2]                            | H9         |
| pCK026 <sup>GB</sup>                      | CDS1        | <i>Bs3</i> gene (encodes an FMO enzyme) from <i>Capsicum annuum</i> [34]                        | H10        |
| pJOG822 <sup>GB</sup>                     | CDS1        | Yellow Fluorescent Protein ( <i>YFP</i> ) fused with SV40 NLS                                   | H11        |
| pJOG587 <sup>GB</sup>                     | CDS2        | $\beta$ -glucuronidase ( <i>Escherichia coli</i> ) CDS with two introns, no ATG-START codon [1] | H12        |

\* module not experimentally validated

<sup>GB</sup> compatible with GoldenBraid system (no *BsmBI* sites)

|   | 1                                                     | 2                                     | 3                                                          | 4                                                                        | 5                                                                           | 6                                       | 7                                            | 8                                      | 9                                                | 10                                                  | 11                                                    | 12                                                      |
|---|-------------------------------------------------------|---------------------------------------|------------------------------------------------------------|--------------------------------------------------------------------------|-----------------------------------------------------------------------------|-----------------------------------------|----------------------------------------------|----------------------------------------|--------------------------------------------------|-----------------------------------------------------|-------------------------------------------------------|---------------------------------------------------------|
| A | pJOG130<br>CDS1<br>GG-GW<br>shuttle                   | pJOG131<br>CDS1ns<br>GG-GW<br>shuttle | pJOG387<br>CDS1<br>GW<br>destination                       | pJOG267<br>CDS1ns<br>GW<br>destination                                   | pJOG562<br>Pro+CDS1ns<br>GW<br>destination                                  | pJOG417<br>CDS1<br>Y2H-AD               | pJOG418<br>CDS1<br>Y2H-BD                    | pCK011<br>CDS1ns<br>Y2H-AD             | pCK012<br>CDS1ns<br>Y2H-BD                       | pCK013<br>CDS1<br>Bacterial<br>secretion<br>AvrRps4 | pCK014<br>CDS1ns<br>Bacterial<br>secretion<br>AvrRps4 | pCK015<br>CDS1<br>Bacterial<br>secretion<br>AvrRpt2     |
| B | pCK016<br>CDS1ns<br>Bacterial<br>secretion<br>AvrRpt2 | pTRV2-GG<br>VIGS<br>GG-TRV2           | pTEI036<br>Pro+5U<br>min35S:LexA<br>Estradiol<br>inducible | pTEI042<br>Pro+5U<br>min35S:<br>GAL4 <sub>UAS</sub><br>DEX-<br>inducible | pJOG644<br>Pro+5U(f)<br>min35S:<br>GAL4 <sub>UAS</sub><br>DEX-<br>inducible | pTEI038<br>Pro+5U<br>pG10-90            | pJOG640<br>Pro+5U(f)<br>35S:+5'UTR<br>of TMV | pJOG684<br>Pro+5U<br>p(At)UBQ10        | pJOG603<br>Pro+5U<br>p(At)RPS5a                  | pTEI044<br>Pro+5U(f)<br>p(At)RPS5a                  | pJOG301<br>Pro+5U<br>p(At)DD45/<br>EC1.2              | pAGM28521<br>Pro+5U<br>fusion<br>p(At)EC1.2en<br>+EC1.1 |
| C | pJOG299<br>Pro+5U<br>p(At)AP1                         | pJOG298<br>Pro+5U<br>p(At)ICU2        | pJOG295<br>Pro+5U<br>p(At)GILT                             | pJOG300<br>Pro+5U<br>pAt1G66850                                          | pJOG025<br>Pro+5U<br>p(At)EDS1                                              | pJOG123<br>Pro+5U(f)<br>p(At)EDS1       | pJOG026<br>Pro+5U<br>p(At)PAD4               | pJOG124<br>Pro+5U(f)<br>p(At)PAD4      | pJOG466<br>Pro+5U<br>p(At)SAG101                 | pJOG467<br>Pro+5U(f)<br>p(At)SAG101                 | pJOG010<br>Pro+5U<br>p(At)PR1                         | pJOG648<br>Pro+5U<br>p(At)SESA3                         |
| D | pTEI067<br>Pro+5U<br>p(At)CER6                        | pTEI068<br>Pro+5U<br>p(At)CUE1        | pTEI069<br>Pro+5U<br>p(At)BODY-<br>GUARD1                  | pTEI070<br>Pro+5U<br>p(At)GC1                                            | pTEI071<br>Pro+5U<br>p(At)CAB3                                              | pTEI073<br>Pro+5U<br>p(At)ALMT12        | pCK019<br>Pro+5U<br>p(At)EXP7                | pCK020<br>Pro+5U<br>p(At)WOX5          | pCK021<br>Pro+5U<br>p(At)SOM-<br>BRERO           | pAGM1761<br>Pro<br>p(At)DMC1                        | pJOG020<br>Pro+5U<br>p(Pc)Ubi4-2                      | pJOG575<br>Pro+5U(f)<br>p(Pc)Ubi4-2                     |
| E | pJOG022<br>Pro+5U<br>p(Zm)Ubi                         | pJOG213<br>Pro+5U<br>p(Si)EDS1        | pJOG004<br>Pro+5U(f)<br>p(Si)EDS1                          | pJOG535<br>Pro+5U<br>p(Ca)Bs3                                            | pJOG577<br>Pro+5U(f)<br>p(Ca)Bs3                                            | pJOG638<br>Pro+5U<br>p(Ca)Bs3<br>weaker | pJOG639<br>Pro+5U(f)<br>p(Ca)Bs3<br>weaker   | pJOG170<br>NT1<br>CDS of<br>mEGFP      | pJOG176<br>CT<br>CDS of<br>mEGFP                 | pJOG169<br>NT1<br>CDS of<br>mTRQ                    | pJOG175<br>CT<br>CDS of<br>mTRQ                       | pJOG168<br>NT1<br>CDS of<br>mVenus                      |
| F | pJOG174<br>CT<br>CDS of<br>mVenus                     | pJOG142<br>CT<br>mYFP-NES             | pJOG143<br>CT<br>mYFP-NLS                                  | pJOG140<br>NT1<br>NES                                                    | pJOG141<br>NT1<br>NLS                                                       | pJOG824<br>CT<br>NLS                    | pAGM16456<br>NT1<br>6xHis-NES<br>(Rev)       | pAGM16467<br>NT1<br>6xHis-NES<br>(PKI) | pAGM16418<br>NT1<br>6xHis-<br>NES(Rev)-<br>GFP   | pAGM16429<br>NT1<br>6xHis-<br>NES(PKI)-<br>GFP      | pJOG642<br>NT1<br>3xHA-<br>tagRFP-T                   | pJOG317<br>CT<br>4 x Myc-<br>2Strep                     |
| G | pJOG331<br>CT<br>6xHA-<br>2Strep                      | pJOG658<br>NT1<br>3xHA-LUC            | pJOG659<br>CT<br>REN-3xHA                                  | pJOG643<br>NT1<br>GR (rat)                                               | pCK032<br>CT<br>GR (rat)                                                    | pTEI037<br>NT1<br>GR-mEGFP              | pTEI041<br>NT1<br>ER (human)                 | pCK025<br>CT<br>ER (human)             | pAGM16841<br>CT-3U+ter<br>STOP+nos<br>terminator | pJOG173<br>CDS1<br>mEGFP                            | pJOG172<br>CDS1<br>mTRQ                               | pJOG171<br>CDS1<br>mVenus                               |
| H | pJOG021<br>CDS1<br>hpt                                | pJOG351<br>CDS1<br>nptII              | pJOG031<br>CDS1<br>AvrRps4                                 | pJOG536<br>CDS1<br>NTF from<br>INTACT                                    | pJOG545<br>CDS1<br>AvrBs3                                                   | pCK039<br>CDS1<br>dTALE                 | pCK038<br>CDS1ns<br>dTALE                    | pJOG641<br>CDS1<br>GVG<br>synthetic TF | pTEI039<br>CDS1<br>XVE<br>synthetic TF           | pCK026<br>CDS1<br>Bs3                               | pJOG822<br>CDS1<br>YFP-NLS                            | pJOG587<br>CDS2<br>GUS-ATG                              |

 contains *ccdB*/*cat* cassette. Propagation of empty plasmid requires *ccdB* survival/DB3.1 cells, and additional Chloramphenicol selection is advised.  
 contains *lacZ* fragment for blue/white selection

 bacterial selection: Kanamycin

 bacterial selection: Spectinomycin

 bacterial selection: Ampicillin / Carbenicillin

 bacterial selection: Gentamicin

## References

1. Engler, C., M. Youles, R. Gruetzner, T.M. Ehnert, S. Werner, J.D. Jones, N.J. Patron, and S. Marillonnet, *A Golden Gate Modular Cloning Toolbox for Plants*. ACS Synth Biol, 2014.
2. Zuo, J., Q.W. Niu, and N.H. Chua, *An estrogen receptor-based transactivator XVE mediates highly inducible gene expression in transgenic plants*. Plant J, 2000. **24**(2): p. 265-73.
3. Aoyama, T. and N.H. Chua, *A glucocorticoid-mediated transcriptional induction system in transgenic plants*. Plant J, 1997. **11**(3): p. 605-12.
4. Ishige, F., M. Takaichi, R. Foster, N.H. Chua, and K. Oeda, *A G-box motif (GCCACGTGCC) tetramer confers high-level constitutive expression in dicot and monocot plants*. Plant J, 1999. **18**(4): p. 443-448.
5. Gallie, D.R., D.E. Sleat, J.W. Watts, P.C. Turner, and T.M. Wilson, *The 5'-leader sequence of tobacco mosaic virus RNA enhances the expression of foreign gene transcripts in vitro and in vivo*. Nucleic Acids Res, 1987. **15**(8): p. 3257-73.
6. Ow, D.W., J.D. Jacobs, and S.H. Howell, *Functional regions of the cauliflower mosaic virus 35S RNA promoter determined by use of the firefly luciferase gene as a reporter of promoter activity*. PNAS, 1987. **84**(14): p. 4870-4.
7. Guilley, H., R.K. Dudley, G. Jonard, E. Balazs, and K.E. Richards, *Transcription of Cauliflower mosaic virus DNA: detection of promoter sequences, and characterization of transcripts*. Cell, 1982. **30**(3): p. 763-73.
8. Grefen, C., N. Donald, K. Hashimoto, J. Kudla, K. Schumacher, and M.R. Blatt, *A ubiquitin-10 promoter-based vector set for fluorescent protein tagging facilitates temporal stability and native protein distribution in transient and stable expression studies*. Plant J, 2010. **64**(2): p. 355-65.
9. Tsutsui, H. and T. Higashiyama, *pKAMA-ITACHI Vectors for Highly Efficient CRISPR/Cas9-Mediated Gene Knockout in Arabidopsis thaliana*. Plant Cell Physiol, 2017. **58**(1): p. 46-56.
10. Steffen, J.G., I.H. Kang, J. Macfarlane, and G.N. Drews, *Identification of genes expressed in the Arabidopsis female gametophyte*. Plant J, 2007. **51**(2): p. 281-92.
11. Wang, Z.P., H.L. Xing, L. Dong, H.Y. Zhang, C.Y. Han, X.C. Wang, and Q.J. Chen, *Egg cell-specific promoter-controlled CRISPR/Cas9 efficiently generates homozygous mutants for multiple target genes in Arabidopsis in a single generation*. Genome Biol, 2015. **16**: p. 144.
12. Gao, Y., Y. Zhang, D. Zhang, X. Dai, M. Estelle, and Y. Zhao, *Auxin binding protein 1 (ABP1) is not required for either auxin signaling or Arabidopsis development*. PNAS, 2015. **112**(7): p. 2275-80.
13. Hyun, Y., J. Kim, S.W. Cho, Y. Choi, J.S. Kim, and G. Coupland, *Site-directed mutagenesis in Arabidopsis thaliana using dividing tissue-targeted RGEN of the CRISPR/Cas system to generate heritable null alleles*. Planta, 2015. **241**(1): p. 271-84.
14. Wagner, S., J. Stuttmann, S. Rietz, R. Guerois, E. Brunstein, J. Bautor, K. Niefind, and J.E. Parker, *Structural basis for signaling by exclusive EDS1 heteromeric complexes with SAG101 or PAD4 in plant innate immunity*. Cell Host Microbe, 2013. **14**(6): p. 619-30.
15. Feys, B.J., L.J. Moisan, M.A. Newman, and J.E. Parker, *Direct interaction between the Arabidopsis disease resistance signaling proteins, EDS1 and PAD4*. EMBO Journal, 2001. **20**(19): p. 5400-5411.
16. Jirage, D., T.L. Tootle, T.L. Reuber, L.N. Frost, B.J. Feys, J.E. Parker, F.M. Ausubel, and J. Glazebrook, *Arabidopsis thaliana PAD4 encodes a lipase-like gene that is important for salicylic acid signaling*. PNAS, 1999. **96**(23): p. 13583-8.
17. Feys, B.J., M. Wiermer, R.A. Bhat, L.J. Moisan, N. Medina-Escobar, C. Neu, A. Cabral, and J.E. Parker, *Arabidopsis SENESCENCE-ASSOCIATED GENE101 stabilizes and signals within an ENHANCED DISEASE SUSCEPTIBILITY1 complex in plant innate immunity*. Plant Cell, 2005. **17**(9): p. 2601-13.
18. van Loon, L.C., M. Rep, and C.M. Pieterse, *Significance of inducible defense-related proteins in infected plants*. Annu Rev Phytopathol, 2006. **44**: p. 135-62.
19. Kroj, T., G. Savino, C. Valon, J. Giraudat, and F. Parcy, *Regulation of storage protein gene expression in Arabidopsis*. Development, 2003. **130**(24): p. 6065-73.

20. Hooker, T.S., A.A. Millar, and L. Kunst, *Significance of the expression of the CER6 condensing enzyme for cuticular wax production in Arabidopsis*. Plant Phys, 2002. **129**(4): p. 1568-80.
21. Li, H., K. Culligan, R.A. Dixon, and J. Chory, *CUE1: A Mesophyll Cell-Specific Positive Regulator of Light-Controlled Gene Expression in Arabidopsis*. Plant Cell, 1995. **7**(10): p. 1599-1610.
22. Kurdyukov, S., A. Faust, C. Nawrath, S. Bar, D. Voisin, N. Efremova, R. Franke, L. Schreiber, H. Saedler, J.P. Metraux, and A. Yephremov, *The epidermis-specific extracellular BODYGUARD controls cuticle development and morphogenesis in Arabidopsis*. Plant Cell, 2006. **18**(2): p. 321-39.
23. Yang, Y., A. Costa, N. Leonhardt, R.S. Siegel, and J.I. Schroeder, *Isolation of a strong Arabidopsis guard cell promoter and its potential as a research tool*. Plant Methods, 2008. **4**: p. 6.
24. Susek, R.E., F.M. Ausubel, and J. Chory, *Signal transduction mutants of Arabidopsis uncouple nuclear CAB and RBCS gene expression from chloroplast development*. Cell, 1993. **74**(5): p. 787-99.
25. Meyer, S., P. Mumm, D. Imes, A. Endler, B. Weder, K.A. Al-Rasheid, D. Geiger, I. Marten, E. Martinoia, and R. Hedrich, *AtALMT12 represents an R-type anion channel required for stomatal movement in Arabidopsis guard cells*. Plant J, 2010. **63**(6): p. 1054-62.
26. Stenzel, I., T. Ischebeck, S. Konig, A. Holubowska, M. Sporysz, B. Hause, and I. Heilmann, *The type B phosphatidylinositol-4-phosphate 5-kinase 3 is essential for root hair formation in Arabidopsis thaliana*. Plant Cell, 2008. **20**(1): p. 124-41.
27. Cho, H.T. and D.J. Cosgrove, *Regulation of root hair initiation and expansin gene expression in Arabidopsis*. Plant Cell, 2002. **14**(12): p. 3237-53.
28. Sarkar, A.K., M. Luijten, S. Miyashima, M. Lenhard, T. Hashimoto, K. Nakajima, B. Scheres, R. Heidstra, and T. Laux, *Conserved factors regulate signalling in Arabidopsis thaliana shoot and root stem cell organizers*. Nature, 2007. **446**(7137): p. 811-4.
29. Bennett, T., A. van den Toorn, G.F. Sanchez-Perez, A. Campilho, V. Willemsen, B. Snel, and B. Scheres, *SOMBRERO, BEARSKIN1, and BEARSKIN2 regulate root cap maturation in Arabidopsis*. Plant Cell, 2010. **22**(3): p. 640-54.
30. Willemsen, V., M. Bauch, T. Bennett, A. Campilho, H. Wolkenfelt, J. Xu, J. Haseloff, and B. Scheres, *The NAC domain transcription factors FEZ and SOMBRERO control the orientation of cell division plane in Arabidopsis root stem cells*. Dev Cell, 2008. **15**(6): p. 913-22.
31. Klimyuk, V.I. and J.D. Jones, *AtDMC1, the Arabidopsis homologue of the yeast DMC1 gene: characterization, transposon-induced allelic variation and meiosis-associated expression*. Plant J, 1997. **11**(1): p. 1-14.
32. Fauser, F., S. Schiml, and H. Puchta, *Both CRISPR/Cas-based nucleases and nickases can be used efficiently for genome engineering in Arabidopsis thaliana*. Plant J, 2014. **79**(2): p. 348-59.
33. Christensen, A.H., R.A. Sharrock, and P.H. Quail, *Maize polyubiquitin genes: structure, thermal perturbation of expression and transcript splicing, and promoter activity following transfer to protoplasts by electroporation*. Plant Mol Biol, 1992. **18**(4): p. 675-89.
34. Romer, P., S. Hahn, T. Jordan, T. Strauss, U. Bonas, and T. Lahaye, *Plant pathogen recognition mediated by promoter activation of the pepper Bs3 resistance gene*. Science, 2007. **318**(5850): p. 645-8.
35. Hecker, A., N. Wallmeroth, S. Peter, M.R. Blatt, K. Harter, and C. Grefen, *Binary 2in1 Vectors Improve in Planta (Co)localization and Dynamic Protein Interaction Studies*. Plant Phys, 2015. **168**(3): p. 776-87.
36. Yang, T.T., L. Cheng, and S.R. Kain, *Optimized codon usage and chromophore mutations provide enhanced sensitivity with the green fluorescent protein*. Nucleic Acids Res, 1996. **24**(22): p. 4592-3.
37. Goedhart, J., D. von Stetten, M. Noirclerc-Savoye, M. Lelimosin, L. Joosen, M.A. Hink, L. van Weeren, T.W. Gadella, Jr., and A. Royant, *Structure-guided evolution of cyan fluorescent proteins towards a quantum yield of 93%*. Nat Commun, 2012. **3**: p. 751.

38. Nagai, T., K. Ibata, E.S. Park, M. Kubota, K. Mikoshiba, and A. Miyawaki, *A variant of yellow fluorescent protein with fast and efficient maturation for cell-biological applications*. Nature Biotechnology, 2002. **20**(1): p. 87-90.
39. Wen, W., J.L. Meinkoth, R.Y. Tsien, and S.S. Taylor, *Identification of a signal for rapid export of proteins from the nucleus*. Cell, 1995. **82**(3): p. 463-73.
40. Garcia, A.V., S. Blanvillain-Baufume, R.P. Huibers, M. Wiermer, G. Li, E. Gobbato, S. Rietz, and J.E. Parker, *Balanced nuclear and cytoplasmic activities of EDS1 are required for a complete plant innate immune response*. PLoS Pathog, 2010. **6**: p. e1000970.
41. Lange, A., R.E. Mills, C.J. Lange, M. Stewart, S.E. Devine, and A.H. Corbett, *Classical nuclear localization signals: definition, function, and interaction with importin alpha*. J Biol Chem, 2007. **282**(8): p. 5101-5.
42. Shaner, N.C., M.Z. Lin, M.R. McKeown, P.A. Steinbach, K.L. Hazelwood, M.W. Davidson, and R.Y. Tsien, *Improving the photostability of bright monomeric orange and red fluorescent proteins*. Nat Methods, 2008. **5**(6): p. 545-51.
43. Schmidt, T.G., L. Batz, L. Bonet, U. Carl, G. Holzapfel, K. Kiem, K. Matulewicz, D. Niermeier, I. Schuchardt, and K. Stanar, *Development of the Twin-Strep-tag(R) and its application for purification of recombinant proteins from cell culture supernatants*. Protein Expr Purif, 2013. **92**(1): p. 54-61.
44. Gould, S.J. and S. Subramani, *Firefly luciferase as a tool in molecular and cell biology*. Anal Biochem, 1988. **175**(1): p. 5-13.
45. Lorenz, W.W., M.J. Cormier, D.J. O'Kane, D. Hua, A.A. Escher, and A.A. Szalay, *Expression of the Renilla reniformis luciferase gene in mammalian cells*. J Biolumin Chemilumin, 1996. **11**(1): p. 31-7.
46. Picard, D., *Steroid-binding domains for regulating the functions of heterologous proteins in cis*. Trends Cell Biol, 1993. **3**(8): p. 278-80.
47. Greene, G.L., P. Gilna, M. Waterfield, A. Baker, Y. Hort, and J. Shine, *Sequence and expression of human estrogen receptor complementary DNA*. Science, 1986. **231**(4742): p. 1150-4.
48. Sundar, I.K. and N. Sakthivel, *Advances in selectable marker genes for plant transformation*. J Plant Phys, 2008. **165**(16): p. 1698-716.
49. Hinsch, M. and B. Staskawicz, *Identification of a new Arabidopsis disease resistance locus, RPS4, and cloning of the corresponding avirulence gene, avrRps4, from Pseudomonas syringae pv. pisi*. Mol Plant Microbe Interact, 1996. **9**(1): p. 55-61.
50. Deal, R.B. and S. Henikoff, *A simple method for gene expression and chromatin profiling of individual cell types within a tissue*. Dev Cell, 2010. **18**(6): p. 1030-40.
51. Boch, J. and U. Bonas, *Xanthomonas AvrBs3 family-type III effectors: discovery and function*. Annu Rev Phytopathol, 2010. **48**: p. 419-36.
